# Supplementary material for: cmdABCDEF, a cluster of genes encoding membrane proteins for differentiation and antibiotic production in Streptomyces coelicolor A3(2)
Source: PubMed Central journal article supplement (PMC2782261; doi:10.1186/1471-2180-9-157), 2009-08-04
Supplement: 1471-2180-9-157-S1.pdf [file 1471-2180-9-157-S1.pdf]

**Table 1S. PCR primers for construction and complementation of *Streptomyces null* mutants**

| Primer name     | Sequences (from 5' to 3')                                                                                                | Mutated strains                              |
|-----------------|--------------------------------------------------------------------------------------------------------------------------|----------------------------------------------|
| Pmtsco4126      | CCTGGCGTCTCTGCTGCGCCGGTGTCTCTACTGGCCCTATGTAGGCTGGAGCTGCTTC<br>TTCGCCACCGGCATCCGAAGGTAGGGGCTGAGCCTGATGATCCGGGGATCCGTCGACC | <i>S. coelicolor</i> $\Delta$ <i>cmdA</i>    |
| Pmtsco4127      | CCTGGCGTCTCTGCTGCGCCGGTGTCTCTACTGGCCCTATGTAGGCTGGAGCTGCTTC<br>TTCGCCACCGGCATCCGAAGGTAGGGGCTGAGCCTGATGATCCGGGGATCCGTCGACC | <i>S. coelicolor</i> $\Delta$ <i>cmdB</i>    |
| Pmtsco4128      | GAGGACGGTCAGCGGTCCCGCATCAGGCTCAGCCCCATGTAGGCTGGAGCTGCTTC<br>CACAGGAGGTGACGGGCGTTGACGACCGAGTCCCACATGATCCGGGGATCCGTCGACC   | <i>S. coelicolor</i> $\Delta$ <i>cmdC</i>    |
| Pmtsco4129      | GGGGCGTGACCGTATGGACATGTGGACTCGTTCGTCATGTAGGCTGGAGCTGCTTC<br>ACCGCTTTGGTTGCCGTTGCTCAGGCAGCCGCGTCTGATCCGGGGATCCGTCGACC     | <i>S. coelicolor</i> $\Delta$ <i>cmdD</i>    |
| Pmtsco4130      | GCAACCAAAGCGGTGAGTTTGAGCGCGGGTGTGGCTATGTAGGCTGGAGCTGCTTC<br>ACACGGCCGACCCGACGTCGAGGGGGGTACGCGCATGATCCGGGGATCCGTCGACC     | <i>S. coelicolor</i> $\Delta$ <i>cmdE</i>    |
| Pmtsco4131      | GTGGGATGGAGGGGAGGAACGGTTGCGTGCCGGGGTTATGTAGGCTGGAGCTGCTTC<br>AGGGCGCGGAATAACCAACAGGGGCGGTGACTTACATGATCCGGGGATCCGTCGACC   | <i>S. coelicolor</i> $\Delta$ <i>cmdF</i>    |
| Pmtsco4126-31   | CCTGGCGTCTCTGCTGCGCCGGTGTCTCTACTGGCCCTATGTAGGCTGGAGCTGCTTC<br>AGGGCGCGGAATAACCAACAGGGGCGGTGACTTACATGATCCGGGGATCCGTCGACC  | <i>S. coelicolor</i> $\Delta$ <i>cmdA-F</i>  |
| Pmtsco6878      | GGTGTGCACGTCCC GCCCCGGGAGTTGTCAGGGGT CATGTAGGCTGGAGCTGCTTC<br>CCCCGCGCTGACACAAGAAAGGAGCAGTAACTCCCCGTGATCCGGGGATCCGTCGACC | <i>S. coelicolor</i> $\Delta$ <i>SCO6878</i> |
| Pmtsco6881      | TGTCGCGAGTGGTCTGGAATGAACCAITTCGGGTTTCATGTAGGCTGGAGCTGCTTC<br>CGCGATGAGTACCACCCGAGAATCGAAGGCCCCGATGATCCGGGGATCCGTCGACC    | <i>S. coelicolor</i> $\Delta$ <i>SCO6881</i> |
| Pmtsav4098-4103 | AGGGCGCAGAACTACCCACTAGGGGCGGTGACTTACATGATCCGGGGATCCGTCGACC<br>GGCTGCTCCGCGCCGCTGCCGGGGCGAAGGGCCTTGTCATGTAGGCTGGAGCTGCTTC | <i>S. avermitilis</i> SAV4098-4103           |
