# Supplementary material for: cmdABCDEF, a cluster of genes encoding membrane proteins for differentiation and antibiotic production in Streptomyces coelicolor A3(2)
Source: PubMed Central journal article supplement (PMC2782261; doi:10.1186/1471-2180-9-157), 2009-08-04
Supplement: 1471-2180-9-157-S2.pdf [file 1471-2180-9-157-S2.pdf]

**Table 2S. Primers for reverse-transcription (RT) PCR**

| Primer name | Sequences (from 5' to 3')                     | Features                                                             |
|-------------|-----------------------------------------------|----------------------------------------------------------------------|
| P67         | GTGCCCATCACGAACACCGT<br>TGATCACCGAGACCGAACGC  | used for validating<br>co-transcription of<br><i>cmdABCDEF</i> genes |
| P78         | GTAGAGCTGGAAGGGGTCGT<br>GAGAAGACCAACGACGACGC  | used for validating<br>co-transcription of<br><i>cmdABCDEF</i> genes |
| P89         | CGGTAGAACGTGCGGTGGTT<br>ATCAGAACCCACAGCAGCCG  | used for validating<br>co-transcription of<br><i>cmdABCDEF</i> genes |
| P90         | CCTTCGCTCGTTTCGAGTA<br>AGAACGGCAAGGCCCTAAG    | used for validating<br>co-transcription of<br><i>cmdABCDEF</i> genes |
| P01         | CGAGGTCTTCGGCTTGTTGC<br>GACCGGCGTGTTTCATCATCG | used for validating<br>co-transcription of<br><i>cmdABCDEF</i> genes |
| PcmdB       | GTTGCCGTTGACGTCCCAGA<br>TATGCCCAGAAGGCCGACGA  | used to detect transcription level<br>of <i>cmdB</i> gene            |
| Pact        | CTCATCGAGGAGTTGTGGGC<br>AGTTTGGCGTGCAGGGTCTC  | used to detect transcription level<br>of <i>actII-orf4</i>           |
| P16S        | TGCCAGCAGCCGCGGTAATA<br>GACTGCAGACCCGGGGTTAA  | used to detect transcription level<br>of <i>16S rRNA</i> gene        |
